# Supplementary material for: Cymbopogon proximus and Petroselinum crispum seed ethanolic extract/Gum Arabic nanogel emulsion: Preventing ethylene glycol and ammonium chloride-induced urolithiasis in rats
Source: Urolithiasis. 2024 Apr 2;52(1):52. doi: 10.1007/s00240-024-01559-2 (PMC10987356; doi:10.1007/s00240-024-01559-2)
Supplement: Supplementary file 1 — Supplementary Material 1 [file 240_2024_1559_MOESM1_ESM.pdf]

**Petroselinum  
Crispum Seed**

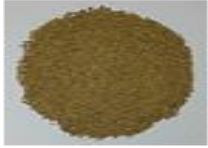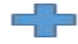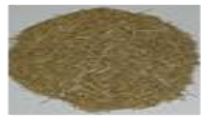

**Cymbopogon Proximus**

**GC-MS analysis**

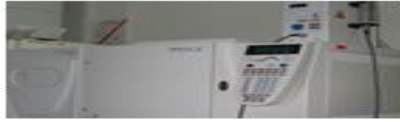

**Extract**

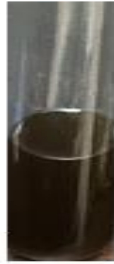

**Gum Arabic**

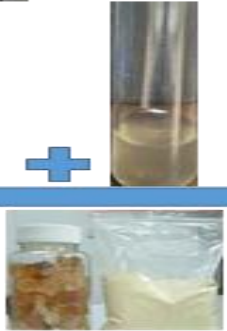

**Urolithiasis rat model**

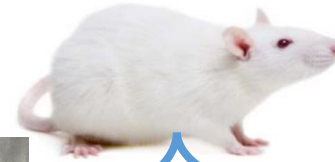

**Emulsion**

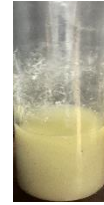

**Nanogel emulsion**

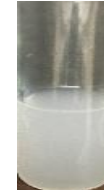

| Parameters         | Group 1      | Group 2      | Group 3      | Group 4      |
|--------------------|--------------|--------------|--------------|--------------|
| Creatinine mg/dl   | 0.81±0.18*   | 2.78±0.70*   | 1.77±0.16*   | 1.13±0.11*   |
| Urea mg/dl         | 17.08±2.83*  | 83.10±1.88*  | 38.33±1.36*  | 23.73±0.82*  |
| BUN mg/dl          | 7.97±1.23*   | 39.82±0.88*  | 17.22±0.72*  | 10.83±0.39*  |
| Urea acid mg/dl    | 1.68±1.82*   | 8.11±0.05*   | 3.50±0.28*   | 1.97±0.07*   |
| Total protein g/dl | 2.23±0.27*   | 6.67±0.32*   | 6.23±0.13*   | 7.81±0.28*   |
| Albumin g/dl       | 2.22±0.06*   | 6.71±0.22*   | 2.81±0.40*   | 2.84±0.07*   |
| Calcium mg/dl      | 11.40±0.14*  | 20.52±0.89*  | 15.34±0.44*  | 12.19±0.13*  |
| Phosphorus mg/dl   | 4.41±0.07*   | 18.52±0.18*  | 9.42±0.38*   | 5.10±0.28*   |
| sodium mmol/dl     | 150.28±2.11* | 157.37±2.33* | 159.03±1.98* | 158.39±2.13* |
| potassium mmol/dl  | 6.06±0.11*   | 4.73±0.28*   | 7.22±0.89**  | 3.81±0.22**  |

**Kidney functions**

| Parameters | Group 1    | Group 2     | Group 3    | Group 4    |
|------------|------------|-------------|------------|------------|
| Urea creat | 0.79±0.17* | 81.00±0.80* | 1.74±0.16* | 1.13±0.11* |
| Urea       | 0.79±0.17* | 81.00±0.80* | 1.74±0.16* | 1.13±0.11* |
| Urea creat | 0.79±0.17* | 81.00±0.80* | 1.74±0.16* | 1.13±0.11* |
| Urea creat | 0.79±0.17* | 81.00±0.80* | 1.74±0.16* | 1.13±0.11* |
| Urea creat | 0.79±0.17* | 81.00±0.80* | 1.74±0.16* | 1.13±0.11* |
| Urea creat | 0.79±0.17* | 81.00±0.80* | 1.74±0.16* | 1.13±0.11* |
| Urea creat | 0.79±0.17* | 81.00±0.80* | 1.74±0.16* | 1.13±0.11* |
| Urea creat | 0.79±0.17* | 81.00±0.80* | 1.74±0.16* | 1.13±0.11* |
| Urea creat | 0.79±0.17* | 81.00±0.80* | 1.74±0.16* | 1.13±0.11* |
| Urea creat | 0.79±0.17* | 81.00±0.80* | 1.74±0.16* | 1.13±0.11* |

**Urine analysis**

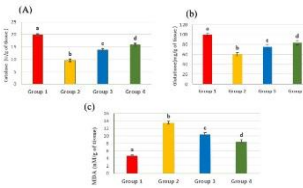

**Renal stress markers**

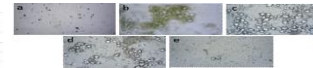

**Urine microscopic analysis**

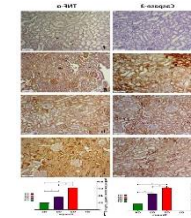

**Immunohistochemical evaluations**

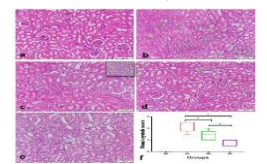

**Histopathology**
